# Supplementary material for: Substrate effects on structural and optoelectronic properties of quasi-2D perovskite films
Source: Royal Society of Chemistry journal article supplement (doi:10.1039/d4tc00892h), 2024-01-01
Supplement: d4tc00892h1.pdf [file d4tc00892h1.pdf]

## Supporting information for

# Substrate Effects on Structural and Optoelectronic Properties of Quasi-2D Perovskite Films

*Chenyu Hu<sup>†</sup>, Zhenmei He<sup>†</sup>, Shuochen Wang<sup>‡</sup>, Lixuan Kan<sup>†</sup>, Sanfeng Lei<sup>†</sup>, Xixiang Zhu<sup>†</sup>,  
Jinpeng Li<sup>†</sup>, Kai Wang<sup>†</sup>, and Haomiao Yu<sup>\*,†</sup>*

<sup>†</sup>Key Laboratory of Luminescence and Optical Information, Ministry of Education,  
School of Physical Science and Engineering, Beijing Jiaotong University, Beijing  
100044, China

<sup>‡</sup>The High School Affiliated to Renmin University of China, Beijing 100080, China

### Corresponding Author

Haomiao Yu\* yuhaomiao@bjtu.edu.cn

## **Experimental section**

*Materials:* PEN substrates were purchased from Peccell Technologies, Inc., PDMS substrates were purchased from Dow Corning Corp. Methylammonium iodide (MAI) and lead iodide ( $\text{PbI}_2$ ) were purchased from Xi'an Polymer Light Technology Corp, 2-phenylethylamine hydroiodide (PEAI) was purchased from Liaoning Preferred New Energy Technology Corp. The organic solvents include dimethyl sulfoxide (DMSO, 99.9%), chlorobenzene (CB, 99.9%) were purchased from Sigma Aldrich. All reagents and chemicals were used as received without further purification.

*Perovskite precursor solutions:* 0.8 mmol of  $\text{PbI}_2$ , 0.6 mmol of MAI, 0.4 mmol of PEA were dissolved in 1.2 ml of a mixed solution of DMF and DMSO (9:1 volume ratio). The prepared quasi 2D perovskite precursor solution was stirred at 50°C for 12 hours. Care was taken to store it away from light using a brown bottle. Prior to spin-coating, the solution was filtered through a 0.22  $\mu\text{m}$  polytetrafluoroethylene (PTFE) needle filter tip into a clear white bottle to obtain a clear, yellow solution of the perovskite precursor.

*Sample preparation and device fabrication:* Silicon, glass, PEN, and PDMS substrates were first meticulously cleaned through ultrasonic washing in distilled water, isopropanol, and ethanol, followed by treatment with UV-ozone plasma to enhance surface properties. In order to avoid large movement and deformation of the flexible substrate and maintain a stable temperature during the film preparation process, the flexible PEN and PDMS substrates are supported by rigid glass substrate. The PEN substrate is fixed on the glass by double-sided tape, and the PDMS substrate is directly

attached to the glass due to its good adhesion. These prepared substrates were subsequently coated with a perovskite precursor solution using a spin-coating technique. The process involved heating the substrate on a hotplate at 100°C for 3 minutes to ensure proper adhesion and film formation. This was followed by a precisely controlled spin-coating step at a speed of 4000 rpm for 30 seconds. A volume of 90  $\mu\text{L}$  of the perovskite precursor solution was accurately dispensed onto the substrate using a pipette, and immediately after the spin-coating process, the substrate was transferred to a hotplate set at 100°C for annealing over 10 minutes to crystallize the film. The fabrication of the devices was finalized by depositing 80 nm thick gold electrodes through thermal evaporation under a high vacuum of  $5 \times 10^{-5}$  Pa at a deposition rate of 0.1  $\text{\AA}/\text{s}$ , establishing the electrical contacts. The active area of the resulting vertical structure devices was meticulously defined to be 0.038  $\text{mm}^2$ .

*Device characterization:* Grazing incidence wide-angle X-ray scattering (GIWAXS) analyses of the films were performed using a Xeuss 2.0 system from Xenocs, France, with a wavelength of 1.54189  $\text{\AA}$  and an incident angle of 0.3°. X-ray diffraction (XRD) measurements were conducted using a Smart Lab 3kW X-ray diffractometer. The films' surface morphologies were examined via scanning electron microscopy (SEM) using a Zeiss EVO 18 SEM. Absorption spectra were acquired with a Shimadzu UV-2600 spectrophotometer. Steady-state and time-resolved photoluminescence (TRPL) measurements were conducted using a Fluorolog-3 fluorescence spectrophotometer from Horiba Scientific. The photoluminescence quantum yield (PLQY) of the thin films was determined using a SpectrumTEQ-EL electroluminescence quantum efficiency

measurement system (Ocean Optics) under 375 nm excitation. The current-voltage ( $I$ - $V$ ) characteristics of the devices were recorded with a Keysight B2912A source meter. Low-temperature PL spectroscopy and  $I$ - $V$  measurements were performed using a cryostat system in conjunction with a Fluorolog-3 fluorescence spectrophotometer and a Keysight B2912A source meter, respectively.

### Supplementary Figures

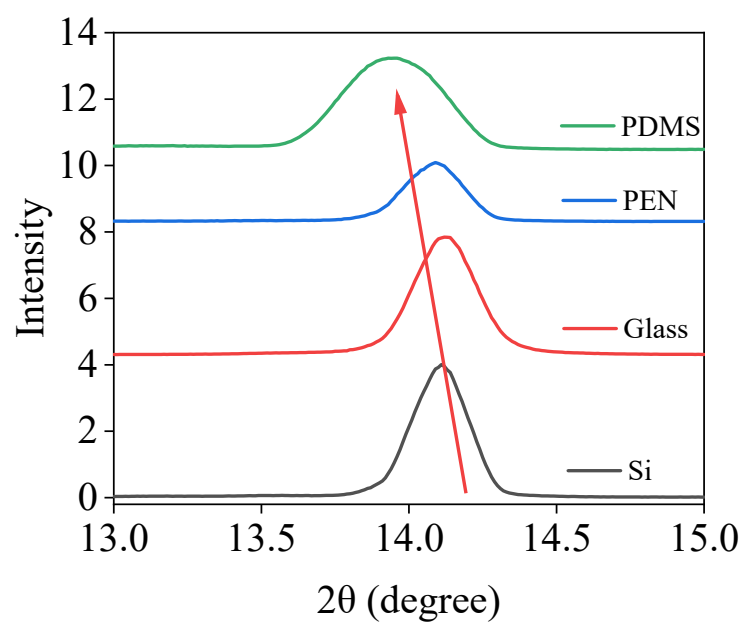

**Figure S1.** XRD patterns of quasi-2D perovskite films deposited on four different substrates, indexed by the (110) plane.

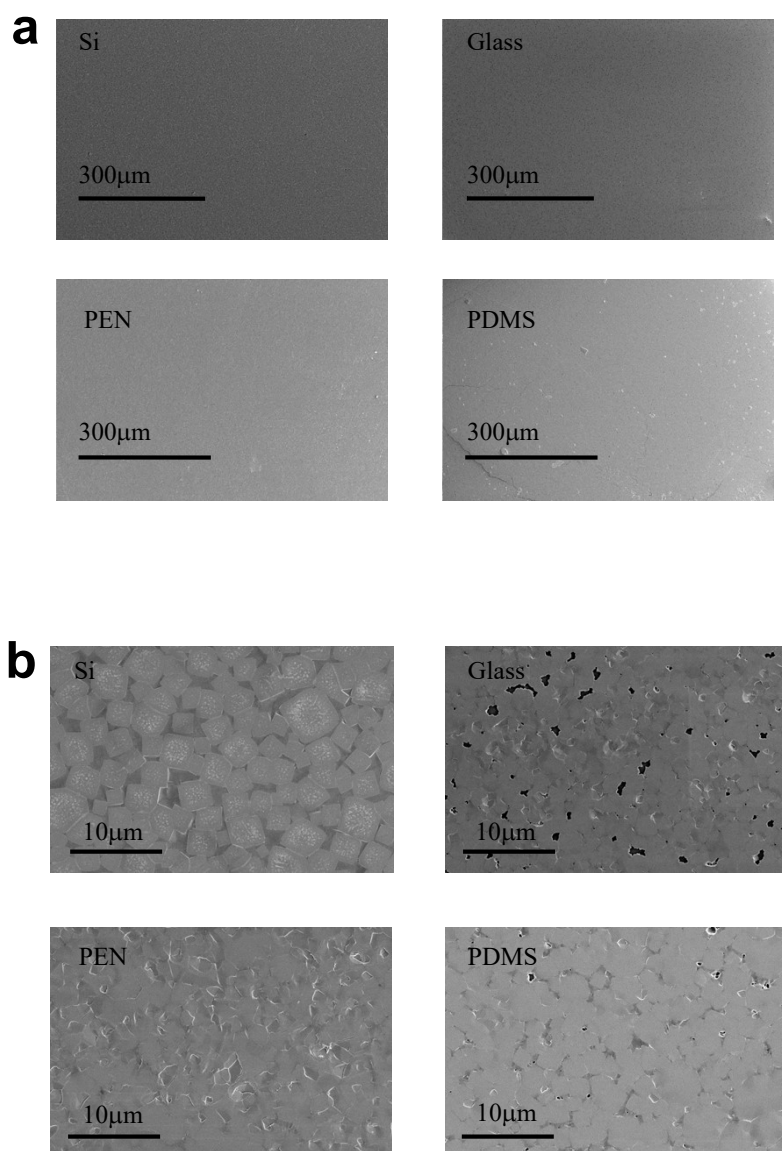

**Figure S2.** SEM images of perovskite on four different substrates, magnification at (a) 500x and (b) 10000x.

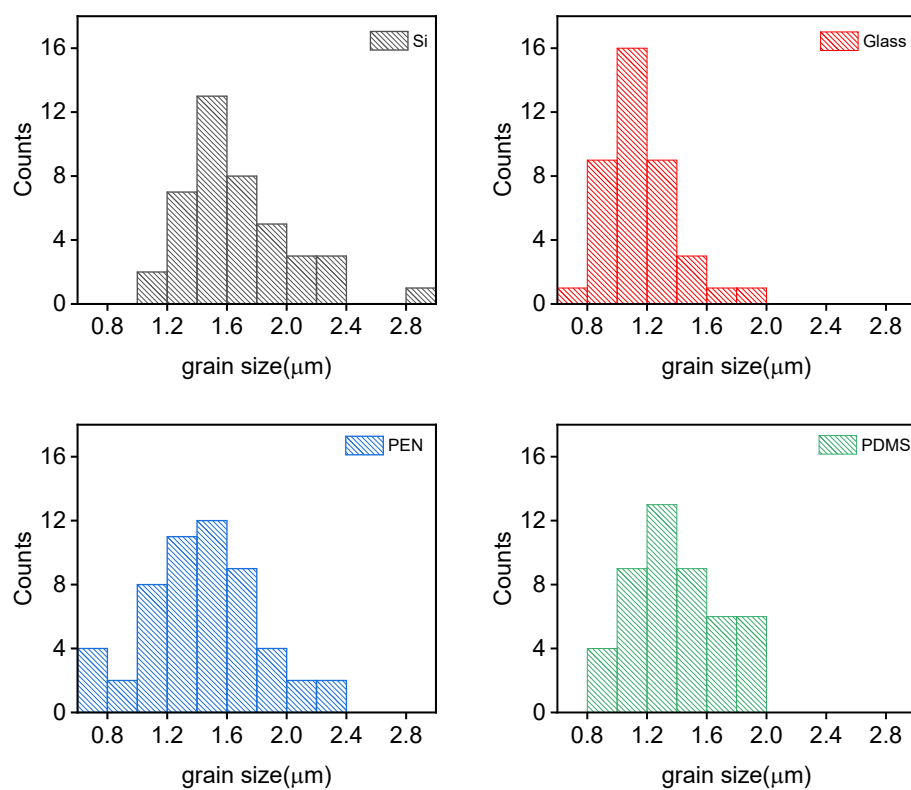

**Figure S3.** Grain size distribution in quasi-2D perovskite films on four different substrates, as derived from SEM images.

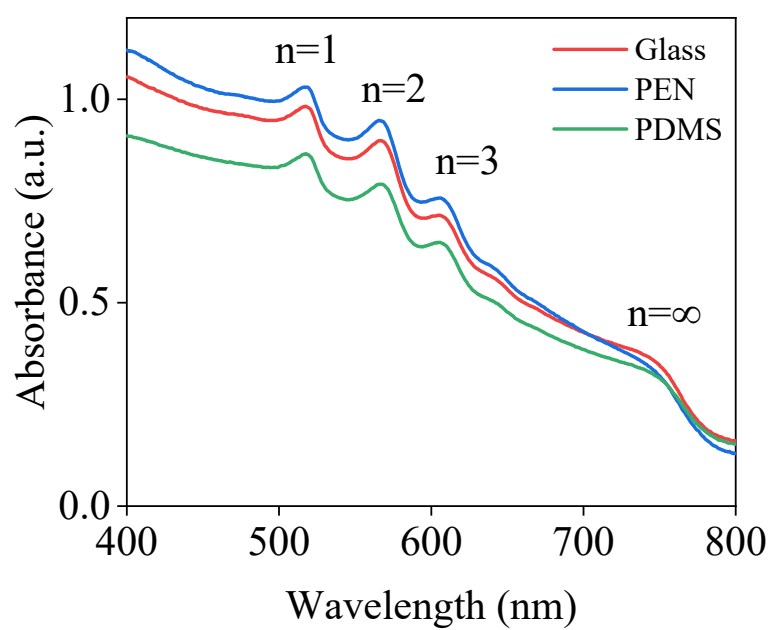

**Figure S4.** UV-vis absorption spectra of quasi-2D perovskites deposited on glass, PEN, and PDMS substrates.

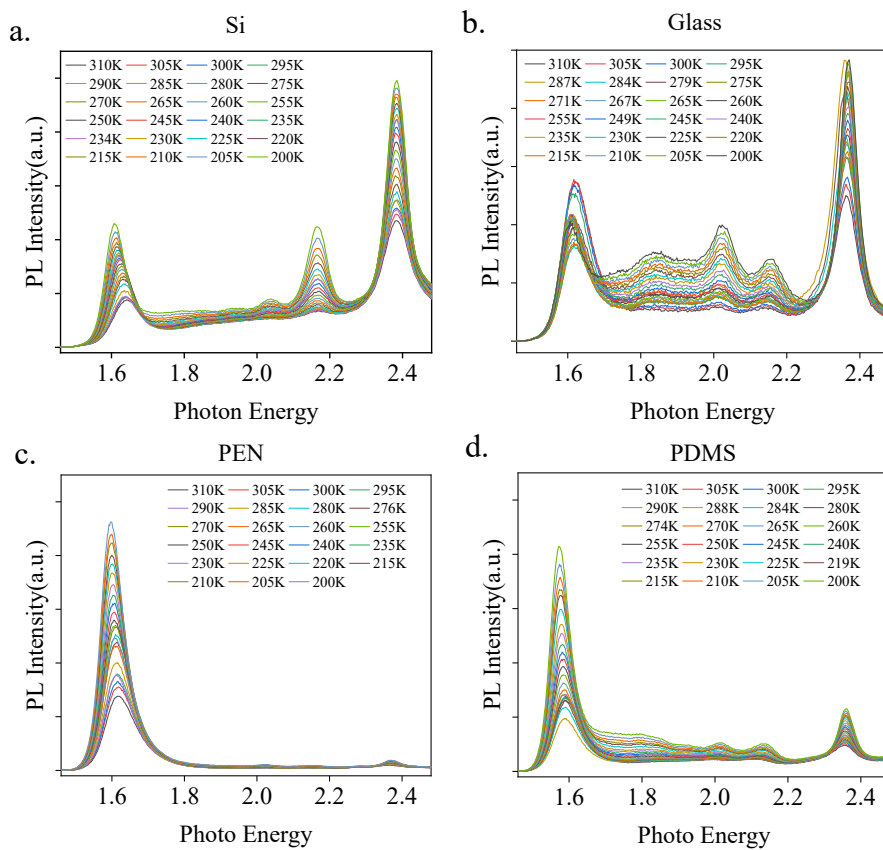

**Figure S5.** PL spectra of quasi- 2D perovskites on four substrates measured at various temperatures.

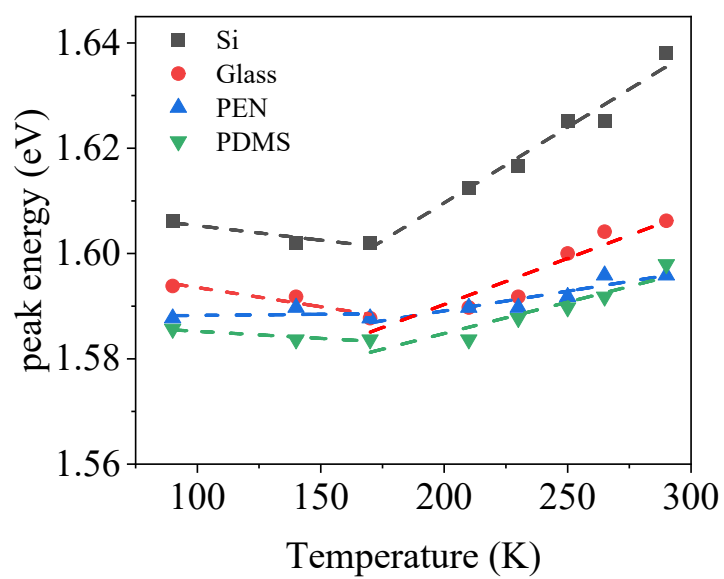

**Figure S6.** Variation of perovskite peak energy, corresponding to 3D-like phases, with temperature for quasi-2D perovskites on four substrates.

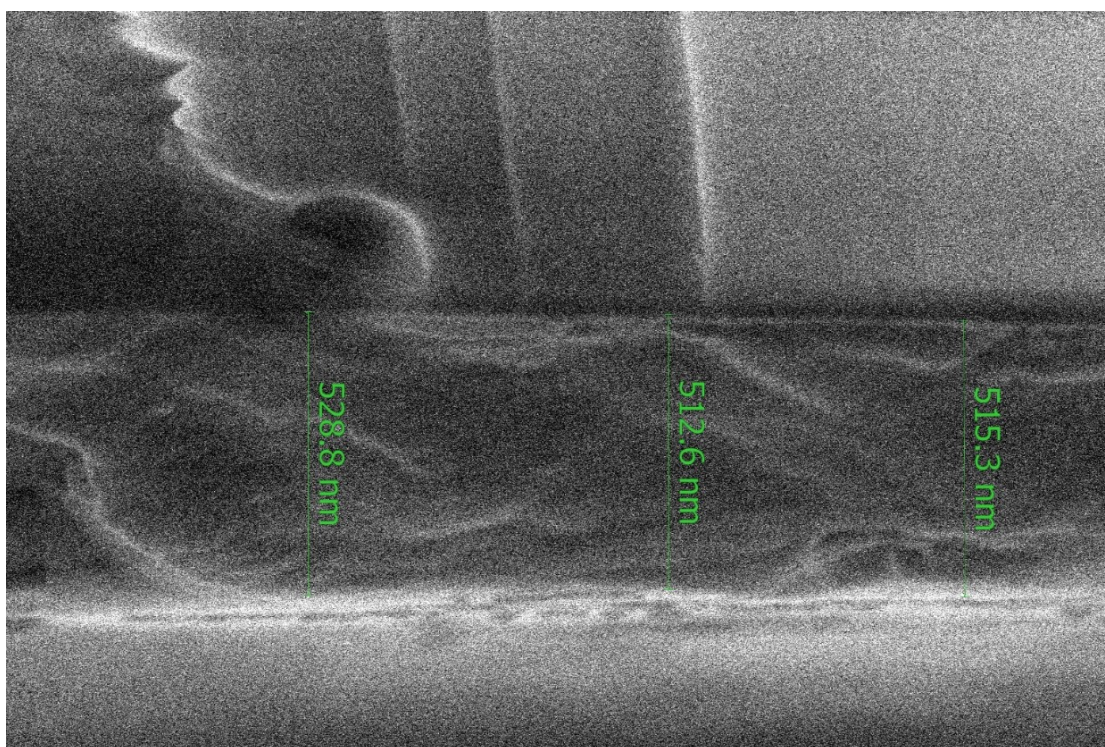

**Figure S7.** Cross-sectional SEM image of a quasi-2D perovskite film prepared using the described experimental method.

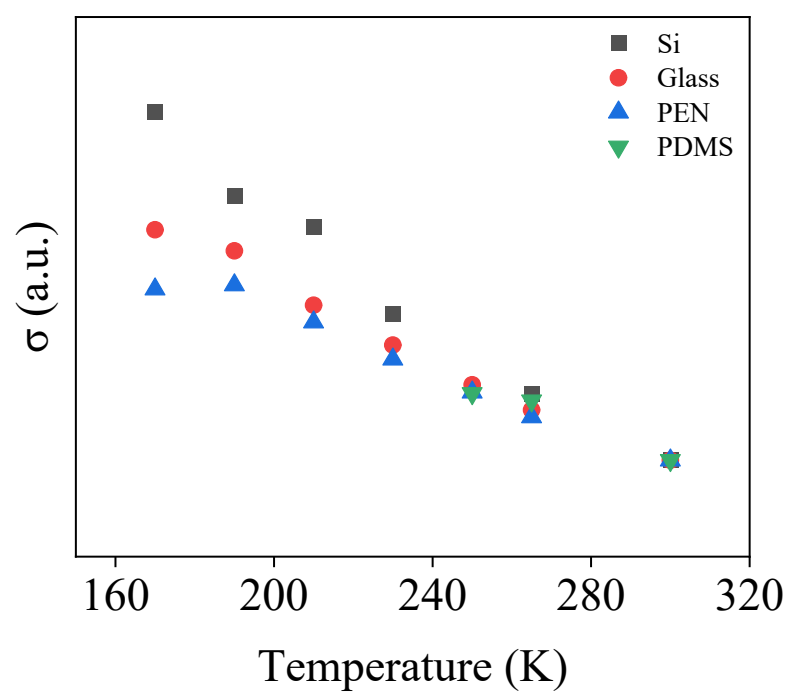

**Figure S8.** Variation of conductivity with temperature for Au/perovskite/Au vertical structure devices on four different substrates.

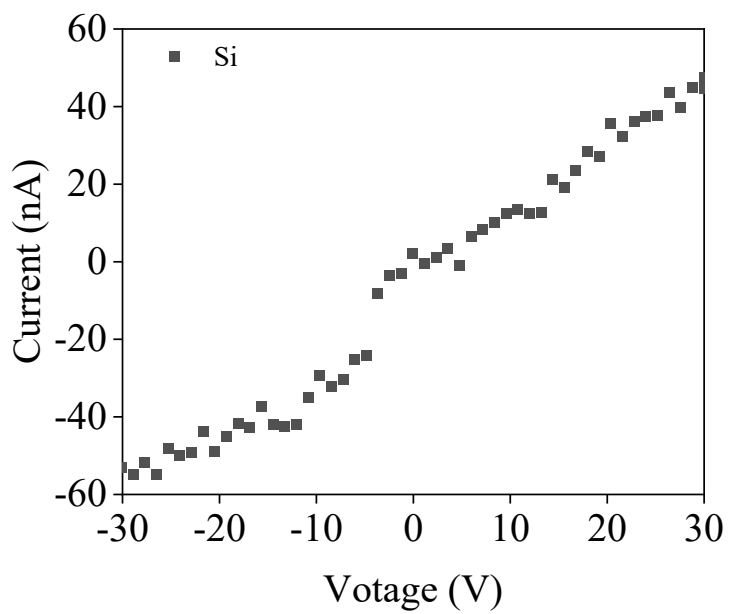

**Figure S9.** *I-V* curve of Au/perovskite/Au lateral device on silicon substrate.

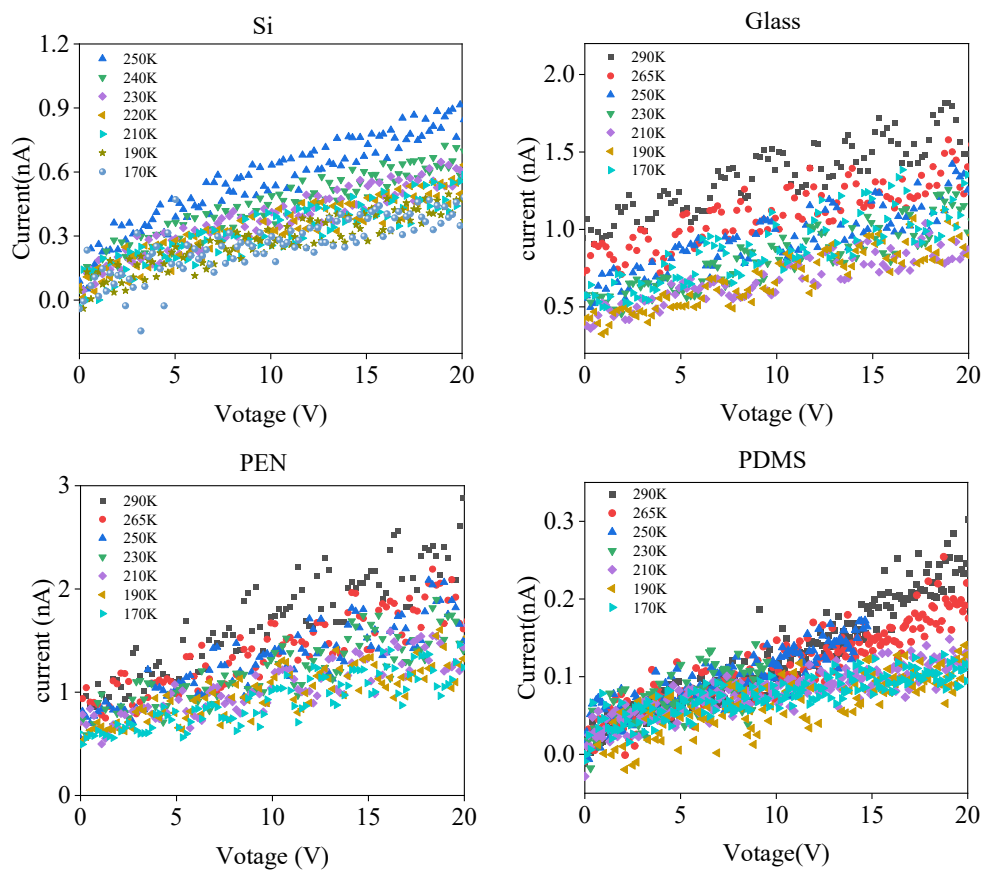

**Figure S10.** Variation of conductivity with temperature for Au/perovskite/Au lateral structure devices on four different substrates.

### **Supplementary Table**

**Table S1:** Determination of time constants in PL decay kinetics through tri-exponential fitting of TRPL spectra.

| <b>Substrate</b> | <b>t<sub>1</sub>(ns)</b> | <b>t<sub>2</sub>(ns)</b> | <b>t<sub>3</sub>(ns)</b> | <b>A<sub>1</sub></b> | <b>A<sub>2</sub></b> | <b>A<sub>3</sub></b> | <b>t<sub>aver</sub>(ns)</b> |
|------------------|--------------------------|--------------------------|--------------------------|----------------------|----------------------|----------------------|-----------------------------|
| <b>Si</b>        | 17.0                     | 564.7                    | 1.8                      | 124                  | 264                  | 255                  | 235.7                       |
| <b>Glass</b>     | 32.6                     | 521.6                    | 1.5                      | 67                   | 65                   | 236                  | 99.4                        |
| <b>PEN</b>       | 14.8                     | 782.6                    | 1.6                      | 54                   | 221                  | 228                  | 346.1                       |
| <b>PDMS</b>      | 23.6                     | 342.9                    | 1.7                      | 35                   | 112                  | 270                  | 95.7                        |
